# Supplementary material
Source: MDPI journal article supplement (https://www.mdpi.com/2673-7426/4/1/39)
Supplement: s1 [file s1]

## Supplemental Documents

Supplemental Table S1: After Action Review (AAR) Questions

| AAR Questions |                                                                                                                                                                                                 |
|---------------|-------------------------------------------------------------------------------------------------------------------------------------------------------------------------------------------------|
| 1             | Did you encounter any issues or problems during the study? If so, describe?                                                                                                                     |
| 2             | What did you think of the simulation instructions? To the best of your knowledge, did they accurately reflect how the procedures would be performed? Are there any changes you would recommend? |
| 3             | What changes, if any, do you recommend to the software? This may include layout, instructions, or navigation aspects.                                                                           |
| 4             | What concerns, if any, do you have with using the software applications to care for patients in remote locations?                                                                               |
| 5             | What did you enjoy most about this experience? Why?                                                                                                                                             |
| 6             | Was there anything you found to be frustrating? Why?                                                                                                                                            |
| 7             | Do you see use of the software applications being of value in your future work? How do you see it being used?                                                                                   |
| 8             | Did you feel stressed during any part of the procedures, if so, when, and why?                                                                                                                  |
| 9             | Did you experience any discomfort or side effects (ie nausea, dizziness) while using the HoloLens?                                                                                              |

Supplemental Table S2: Qualitative Analysis of Theoretical Framework Codes

| Escharotomy                                                           | Fluid Resus                                                   | Med Calc                                                 | TBSA                                  |
|-----------------------------------------------------------------------|---------------------------------------------------------------|----------------------------------------------------------|---------------------------------------|
| HL confidence with incision location                                  | Burn flow sheet confusing                                     | Easier to do calculations in HL                          | HL "much more accurate"               |
| CPG was more appropriate for use                                      | graphs helpful to track over resus                            | No detail on how/why for calculations                    | Coloring easier on paper              |
| Escharotomy instructions too simple                                   | Fluid calcs were frustrating on paper, hadn't done in a while | Frustration: Not done dosage calculation since college   | Mapping is better on paper            |
| Enjoyed real life example of when this is done                        |                                                               | Faster to calculate in HL                                | AR for coloring is frustrating        |
| Not enough detail on how deep the cut is                              |                                                               | Would be great if calculations talked to charting system | Paper/CPG was easier                  |
| Using HL before CPG was "very helpful"                                |                                                               | Easy to mistake input                                    | coloring took a while with AR         |
| Not much instruction on how to do in CPG                              |                                                               | Too many clicks                                          | coloring was challenging              |
| HL helped only for this escharotomy task                              |                                                               | "it has been a while, I need to refresh"                 | awkward drawing in air vs on a tablet |
| have something telling you where to stand so can see during procedure |                                                               | HL calculations were easy and less time consuming        |                                       |
| AR was easier                                                         |                                                               |                                                          |                                       |
| Didn't see the red line                                               |                                                               |                                                          |                                       |

|                                                                                                                                                                                                                                                                                                                                                                                                               |  |  |  |
|---------------------------------------------------------------------------------------------------------------------------------------------------------------------------------------------------------------------------------------------------------------------------------------------------------------------------------------------------------------------------------------------------------------|--|--|--|
| training on escharotomy is invaluable                                                                                                                                                                                                                                                                                                                                                                         |  |  |  |
| Overlay can be distracting                                                                                                                                                                                                                                                                                                                                                                                    |  |  |  |
| Couldn't see through overlay                                                                                                                                                                                                                                                                                                                                                                                  |  |  |  |
| Video in HL was somewhat helpful                                                                                                                                                                                                                                                                                                                                                                              |  |  |  |
| <p><i>Color Key:</i><br/> <i>Blue</i> – External Variables: User training or educational experience, familiarity, age, hardware, environmental elements.<br/> <i>Green</i> – Perceived Usefulness: User's perception of using a particular system enhancing their job or performance.<br/> <i>Purple</i> – Perceived Ease of Use: User's perception of using a particular system would be free of effort.</p> |  |  |  |

Supplemental Table 1 (Continued): Qualitative Analysis of Theoretical Framework Codes

| Usability                                     | Education/training                                                                | Deployment                                                       | CPG                                                | Overall Impression                                         |
|-----------------------------------------------|-----------------------------------------------------------------------------------|------------------------------------------------------------------|----------------------------------------------------|------------------------------------------------------------|
| HL more organized                             | HL training before sim helpful                                                    | size (listed as pro and con)                                     | Info hidden                                        | AR Reduced the stress                                      |
| Provide safe care                             | Practice skills in a more realistic environment                                   | portability (listed as pro and con)                              | Wordy paragraphs                                   | Reliance on technology                                     |
| Potential malfunction                         | "Wish AR did more teaching"                                                       | battery life                                                     | More appropriate for incision                      | AR reduced stress "a great deal"                           |
| Get in way during physical assessment data    | Younger users "will expect to be able to pick up and use it"                      | Fragile                                                          | Easier to quick look up                            | AR Confidence in location of incision                      |
| Connectivity issues                           | Useful for training med students for more hands on                                | Would need to train personnel before use in deployed environment | CPG not helpful for calculating doses              | HL helpful to walk through procedure                       |
| Red line made depth assessment difficult      | good training for escharotomy                                                     | Needs IT support                                                 | CPGs not organized as well as hoped                | More space to move self when having difficulty moving apps |
| HL obscures accurate visualization of patient | Training/intro was helpful for a non-gamer                                        | Value: austere environment to assist clinicians                  | Can get the right answers, not as fast as HL       | "wish it was more detailed" AR                             |
| Hard to move/resize windows                   | this is future in training/education                                              | Ease of use on battlefield is questionable                       | Not much instruction on how to do escharotomy      | Didn't go into details of why things are done AR           |
| HL very clear with instructions               | Good for FTX/Training exercises                                                   | may be problem to take off Kevlar                                | Ketamine dosage should be on Ketamine dose table   | Fun                                                        |
| HL clear guidance                             | If student watched only HL website instructions, they would be able to use the HL | Carrying HL, could get damaged                                   | Cumbersome                                         | Familiarity with oculus/gaming helpful to learn HL         |
| Red line was helpful                          | for training, to check their ability to perform tasks                             | needs to be more rugged                                          | "I am more familiar with CPG"                      | Provider may forget information if they didn't have it     |
| HL faster to find right answers               | great as training tool but user may not retain info without previous knowledge    | helpful at aid station, not POC                                  | "Muscle memory" with paper CPGs, I'm more familiar | AR "Way better than CPG"                                   |

|                                                               |  |                                                                        |                                                                  |                                                                                                |
|---------------------------------------------------------------|--|------------------------------------------------------------------------|------------------------------------------------------------------|------------------------------------------------------------------------------------------------|
| Useful for very specific care                                 |  | where will it be charged?                                              | Easy to navigate but information is "spotty"                     | Apple vs Android, hard if Apple user                                                           |
| HL easier to use than CPG                                     |  | where will it be stored?                                               | Frustrating because not familiar with them                       | AR much more convenient                                                                        |
| Sensitive to hand movements                                   |  | not practical for tactical field care or care under fire               | No frustration with CPGs                                         | Better care                                                                                    |
| Hand position in "high five" is not comfortable               |  | maybe more useful at FOB                                               | Took more effort to find what looking for                        | Increase confidence                                                                            |
| May take too long to use                                      |  | in tactical field care with HL may miss what's going on in environment | Felt flustered couldn't find info in CPG                         | Timely                                                                                         |
| Bulky                                                         |  | too busy watching the HL                                               | paper CPG had more information on tissue layers so easier to cut | Concern: safety                                                                                |
| Could fail                                                    |  | Booting up under fire                                                  | previous knowledge of paper CPG help with using HL               | Demonstration of procedure increased confidence in performance                                 |
| Peripheral vision poor with HL                                |  | Miss real life                                                         |                                                                  | AR was more thorough detail                                                                    |
| Concern: reliability                                          |  | Storing                                                                |                                                                  | Concern: availability                                                                          |
| Concern: use with glasses                                     |  | Charging                                                               |                                                                  | "Would love to have immediate feedback mechanism in AR performance...did I do this correctly?" |
| Trouble with touch/hand gestures                              |  | "I don't think it's feasible in tactical field care"                   |                                                                  | "AR does things automatically, so you are forced to trust it"                                  |
| icons not opening                                             |  | Useful at FOB                                                          |                                                                  | Using in first hour (of injury) is "too much of a distraction"                                 |
| AR easier to navigate                                         |  | Easy to use in the field                                               |                                                                  | Use of HL after patient is stable may help                                                     |
| Concern over documentation in electronic record               |  | Role I use                                                             |                                                                  | Felt more confident in skill because "HL tells me exactly how to do it"                        |
| Assisted as guide path for where to cut and marks where to go |  | Useful in aid station maybe                                            |                                                                  | AR helps inexperienced in doing a skill with confidence                                        |
| AR Easy access                                                |  | may be hard to hear audio in field                                     |                                                                  | HL is "dummy proof"                                                                            |
| Easy to use                                                   |  | Concern: ruggedness                                                    |                                                                  | "I am old fashioned...it's going to take me a while to catch up"                               |

|                                                                                                                                                                                                                                                                                                                                                                                                              |  |                                                                         |  |                                                                                                                   |
|--------------------------------------------------------------------------------------------------------------------------------------------------------------------------------------------------------------------------------------------------------------------------------------------------------------------------------------------------------------------------------------------------------------|--|-------------------------------------------------------------------------|--|-------------------------------------------------------------------------------------------------------------------|
| easy to access                                                                                                                                                                                                                                                                                                                                                                                               |  | concern: battery life                                                   |  | Concern: loss of human interaction possible                                                                       |
| ease of access to information                                                                                                                                                                                                                                                                                                                                                                                |  | if limited light, HL makes it harder to see                             |  | AR CPG got straight to the point                                                                                  |
| "High five" hand gesture is not natural                                                                                                                                                                                                                                                                                                                                                                      |  | going from bright HL to dark room may make difficult for eyes to adjust |  | Value: portable without use of internet                                                                           |
| Cool if HL ported to medical record                                                                                                                                                                                                                                                                                                                                                                          |  |                                                                         |  | "Provider may get wrapped up in trying to navigate the HL instead of caring for patient that is in front of them" |
| Cared for the simulated patient quicker with AR                                                                                                                                                                                                                                                                                                                                                              |  |                                                                         |  | neat to see AR in normal environment                                                                              |
| Hand control and response time was most frustrating                                                                                                                                                                                                                                                                                                                                                          |  |                                                                         |  | Gave visual reference rather than just words on page                                                              |
| HL is easy and accessible way to reference CPG                                                                                                                                                                                                                                                                                                                                                               |  |                                                                         |  | "Too many things on head already"                                                                                 |
| HL was easy                                                                                                                                                                                                                                                                                                                                                                                                  |  |                                                                         |  | May look like you don't know what you are doing if use AR with an awake patient                                   |
| Speeds up process of information                                                                                                                                                                                                                                                                                                                                                                             |  |                                                                         |  | patient may experience delays until provider accesses information or gets used to HL                              |
| HL didn't always pick up voice                                                                                                                                                                                                                                                                                                                                                                               |  |                                                                         |  |                                                                                                                   |
| Sometimes HL picked up slightest hand movement                                                                                                                                                                                                                                                                                                                                                               |  |                                                                         |  |                                                                                                                   |
| couldn't see holographic image up close                                                                                                                                                                                                                                                                                                                                                                      |  |                                                                         |  |                                                                                                                   |
| <p>Color Key:</p> <p><i>Blue</i> – External Variables: User training or educational experience, familiarity, age, hardware, environmental elements.</p> <p><i>Green</i> – Perceived Usefulness: User's perception of using a particular system enhancing their job or performance.</p> <p><i>Purple</i> – Perceived Ease of Use: User's perception of using a particular system would be free of effort.</p> |  |                                                                         |  |                                                                                                                   |
