# Supplementary material
Source: MDPI journal article supplement (https://www.mdpi.com/2673-7426/4/1/39)
Supplement: s1 [file s1]

Archive with 1 entries (1 files):
- biomedinformatics-2821342-supplementary.pdf
